# Supplementary material
Source: Springer Nature journal article supplement (https://www.springermedizin.de/resource/supplementary/13054_2011_9909_MOESM5_ESM.pdf/9707184)

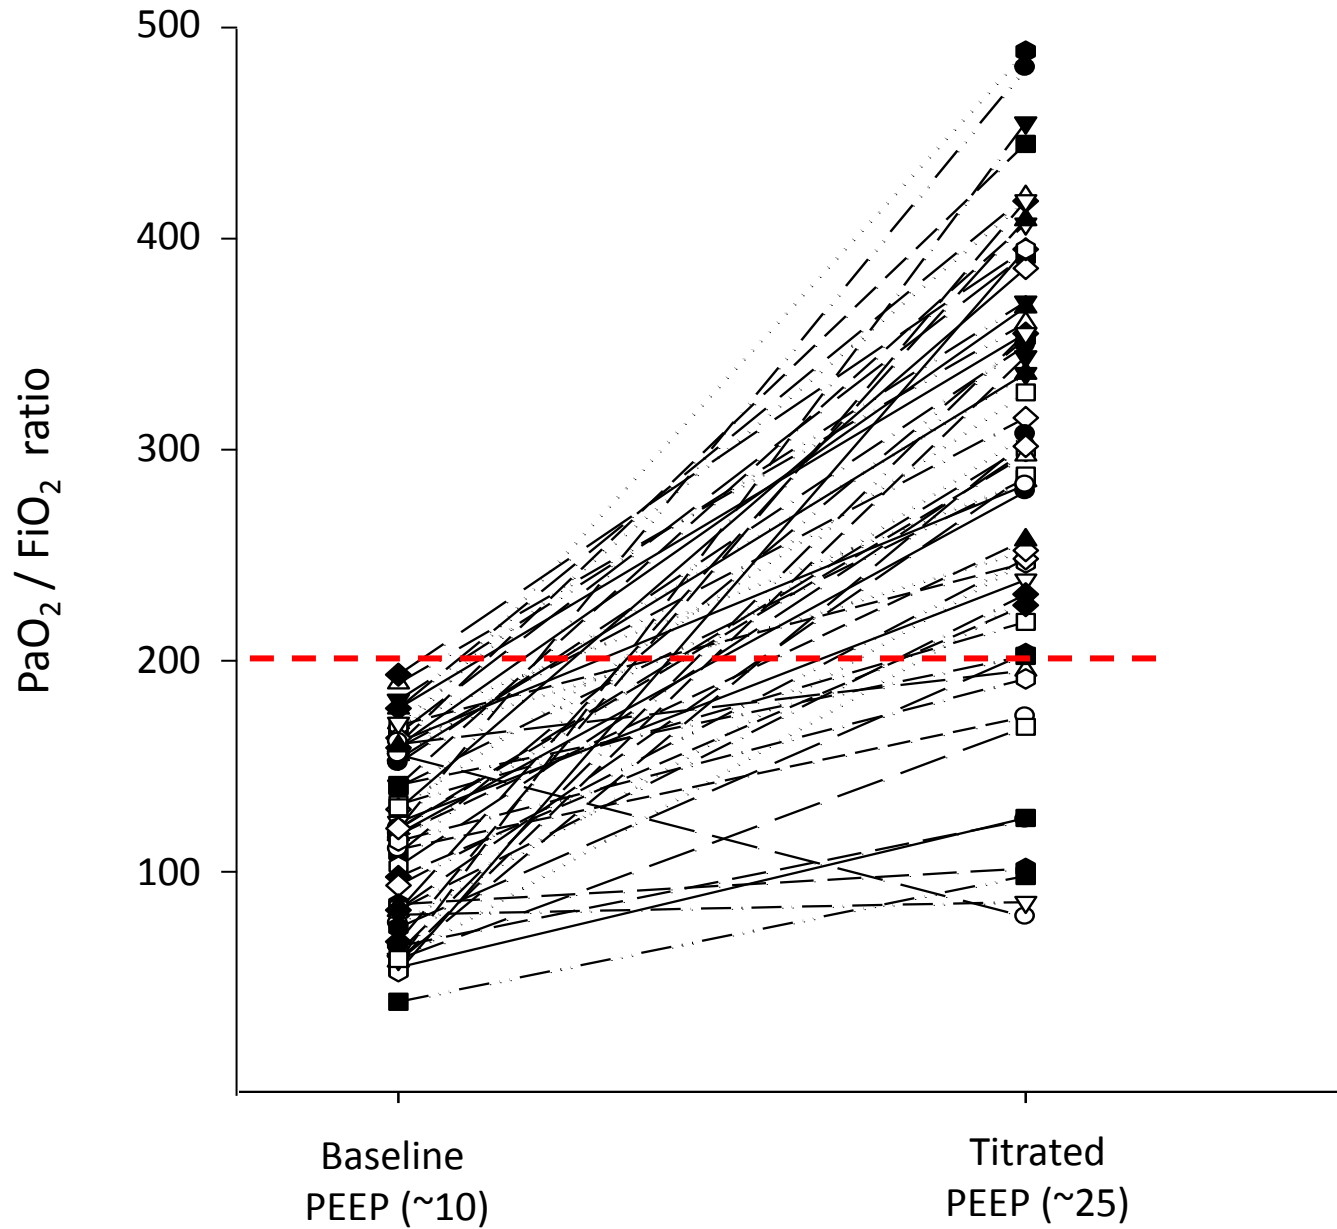

Supplement: MOESM5 [file 9707184]
